# Supplementary material for: Sea-level and monsoonal control on the Maldives carbonate platform (Indian Ocean) over the last 1.3 million years
Source: Copernicus journal article supplement (doi:10.5194/cp-20-547-2024), 2024-03-18
Supplement: Supplementary file 1 [file cp-20-547-2024-supplement.pdf]

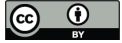

*Supplement of*

## **Sea-level and monsoonal control on the Maldives carbonate platform (Indian Ocean) over the last 1.3 million years**

**Montserrat Alonso-Garcia et al.**

*Correspondence to:* Montserrat Alonso-Garcia (montseag@usal.es) and Jesus Reolid (jreolid@ugr.es)

The copyright of individual parts of the supplement might differ from the article licence.

### Supplementary Information

In the Material and Methods section we stated that the chronology for Site U1467 was performed correlating the Fe and K normalized records from the XRF scanning with the benthic  $\delta^{18}\text{O}$  records of ODP Sites 967–968 (Konijnendijk et al., 2015) and the Prob-stack (Ahn et al., 2017). The comparison of the records to establish the tie-points was performed using QAnalyseries (Kotov and Pälke, 2018). The same method was used previously in Alonso-Garcia et al. (2019) and Alvarez Zarikian et al. (2022), showing an excellent agreement with the benthic  $\delta^{18}\text{O}$  age model of Stainbank et al. (2020). The following table shows the age and depth for all the tie-points included in the age model reconstruction of Site U1467.

Table S1. Age-depth control points used to reconstruct the age model.

| Depth (mcd) | Age (ka) |
|-------------|----------|
| 0.12        | 3.40     |
| 1.08        | 15.00    |
| 2.13        | 72.00    |
| 2.85        | 89.00    |
| 4.42        | 118.38   |
| 5.185       | 133.37   |
| 6.58        | 187.00   |
| 8.89        | 219.00   |
| 9.37        | 237.00   |
| 10.18       | 246.34   |
| 11.8        | 280.34   |
| 12.35       | 290.33   |
| 12.83       | 300.33   |
| 13.82       | 317.33   |
| 14.78       | 333.00   |
| 17.4        | 400.00   |
| 18.33       | 427.30   |
| 19.74       | 474.00   |
| 20.34       | 503.00   |
| 21.33       | 540.00   |
| 22.95       | 580.00   |
| 24.79       | 620.00   |
| 27.07       | 718.00   |
| 27.7        | 754.00   |
| 29.02       | 791.21   |

|       |         |
|-------|---------|
| 29.62 | 814.00  |
| 31.66 | 864.00  |
| 31.84 | 872.00  |
| 33.13 | 894.00  |
| 33.43 | 916.00  |
| 34.09 | 958.00  |
| 35.2  | 986.00  |
| 36.01 | 1004.00 |
| 36.55 | 1034.00 |
| 37.49 | 1064.15 |
| 37.82 | 1094.00 |
| 38.3  | 1102.00 |
| 38.72 | 1120.00 |
| 39.47 | 1156.13 |
| 40.37 | 1191.12 |
| 42.11 | 1246.00 |
| 43.09 | 1288.00 |
| 44.28 | 1342.00 |

## References

Ahn, S., Khider, D., Lisiecki, L. E., and Lawrence, C. E.: A probabilistic Pliocene–Pleistocene stack of benthic  $\delta^{18}\text{O}$  using a profile hidden Markov model, *Dynamics and Statistics of the Climate System*, 2, dzx002, 10.1093/climsys/dzx002, 2017.

Alonso-García, M., Rodrigues, T., Abrantes, F., Padilha, M., Alvarez-Zarikian, C. A., Kunkelova, T., Wright, J. D., and Betzler, C.: Sea-surface temperature, productivity and hydrological changes in the Northern Indian Ocean (Maldives) during the interval ~575-175 ka (MIS 14 to 7), *Palaeogeog. Palaeoclimatol. Palaeoecol.*, 536, 109376, <https://doi.org/10.1016/j.palaeo.2019.109376>, 2019.

Alvarez Zarikian, C. A., Nadiri, C., Alonso-García, M., Rodrigues, T., Huang, H.-H. M., Lindhorst, S., Kunkelova, T., Kroon, D., Betzler, C., and Yasuhara, M.: Ostracod response to monsoon and OMZ variability over the past 1.2 Myr, *Mar. Micropaleontol.*, 174, 102105, <https://doi.org/10.1016/j.marmicro.2022.102105>, 2022.

Konijnendijk, T. Y. M., Ziegler, M., and Lourens, L. J.: On the timing and forcing mechanisms of late Pleistocene glacial terminations: Insights from a new high-resolution benthic stable oxygen isotope record of the eastern Mediterranean, *Quat. Sci. Rev.*, 129, 308-320, <http://dx.doi.org/10.1016/j.quascirev.2015.10.005>, 2015.

Kotov, S. and Pälke, H.: QAnalySeries – a cross-platform time series tuning and analysis tool, AGU Fall Meeting Abstracts pp. PP53D-1230, DOI:10.1002/essoar.10500226.1.,

Stainbank, S., Spezzaferri, S., De Boever, E., Bouvier, A.-S., Chilcott, C., de Leau, E. S., Foubert, A., Kunkelova, T., Pichevin, L., Raddatz, J., Rüggeberg, A., Wright, J. D., Yu, S. M., Zhang, M., and Kroon, D.: Assessing the impact of diagenesis on foraminiferal geochemistry from a low latitude, shallow-water drift deposit, *Earth Planet. Sci. Lett.*, 545, 116390, <https://doi.org/10.1016/j.epsl.2020.116390>, 2020.
